# Supplementary material for: Platinum nanoparticle-deposited multi-walled carbon nanotubes as a NADH oxidase mimic: characterization and applications
Source: Royal Society of Chemistry journal article supplement (doi:10.1039/d0nr04060f), 2020-01-01
Supplement: d0nr04060f1.pdf [file d0nr04060f1.pdf]

## Electronic Supplementary Information

### **Platinum Nanoparticles-Deposited Multiwalled Carbon Nanotubes as a NADH Oxidase Mimic: Characterization and Application**

Haiyan Song,<sup>a</sup> Chunling Ma,<sup>a</sup> Lei Wang,<sup>c</sup> Zhiguang Zhu<sup>a,b,\*</sup>

<sup>a</sup> Tianjin Institute of Industrial Biotechnology, Chinese Academy of Sciences, 32 West Seventh Avenue, Tianjin Airport Economic Area, Tianjin, 300308, P. R. China

<sup>b</sup> School of Chemical Engineering, University of Chinese Academy of Sciences, 19A Yuquan Road, Shijingshan District, Beijing, 100049, P. R. China

<sup>c</sup> National Human Genetic Resource Center, 12 Dahuisi Road, Haidian District, Beijing 100081, P.R. China

## Figures

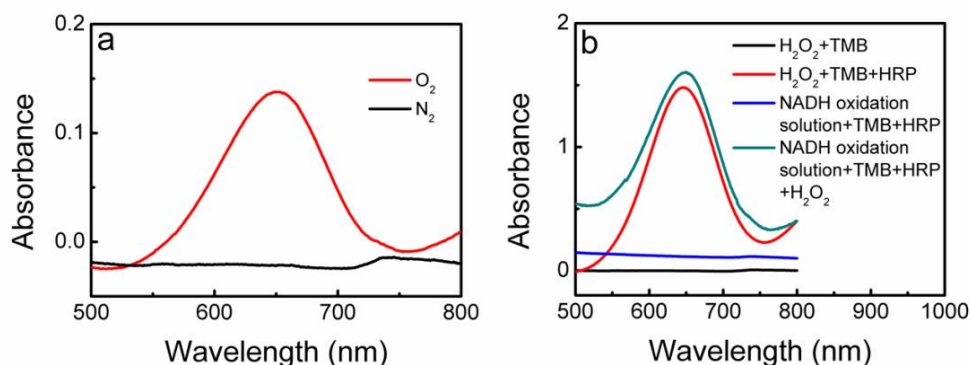

**Fig. S1.** UV-Vis absorbance spectra. (a) Influences of  $O_2$  and  $N_2$  for the oxidation of TMB by PtNPs@MWCNTs. (b) Test whether  $H_2O_2$  was produced in the oxidation of NADH by PtNPs@MWCNTs. TMB:  $5 \mu\text{g mL}^{-1}$ , PtNPs@MWCNTs:  $0.4 \text{ mg mL}^{-1}$ ,  $H_2O_2$ :  $0.2 \text{ mM}$ , HRP:  $1 \mu\text{g mL}^{-1}$ , NADH oxidation solution:  $0.2 \text{ mM}$  NADH was oxidized for 5 min by PtNPs@MWCNTs, followed by the removal of the catalyst and  $N_2$  purging for 30 min.

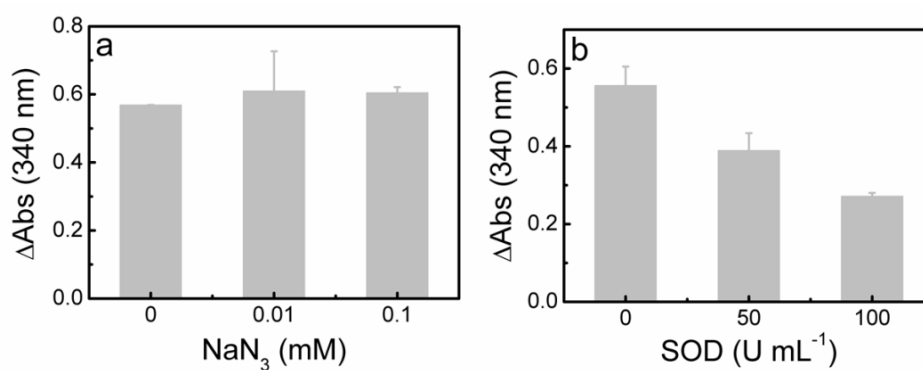

**Fig. S2.** The effect of radical scavengers (a)  $\text{NaN}_3$  and (b) SOD on the oxidation of NADH by PtNPs@MWCNTs.

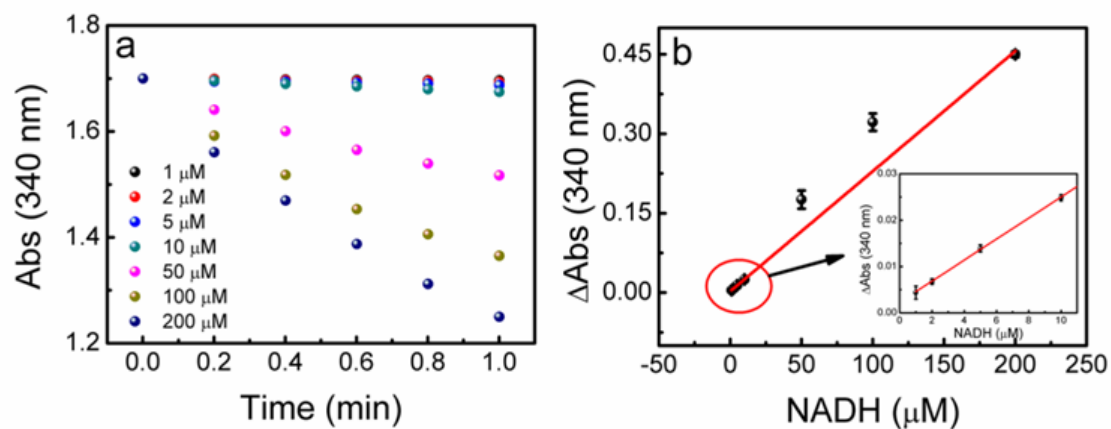

**Fig. S3.** (a) Time-dependent absorbance changes at 340 nm for NADH at different concentrations, (b) Calibration plot for NADH sensing with the nanozyme.

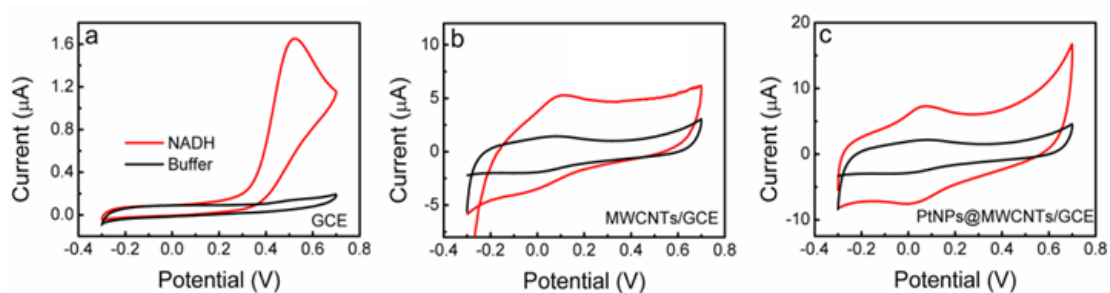

**Fig. S4.** CVs of (a) GCE, (b) MWCNTs/GCE and (c) PtNPs@MWCNTs/GCE in 0.1 M PBS without (black) or with (red) 1 mM NADH at  $10 \text{ mV s}^{-1}$ .

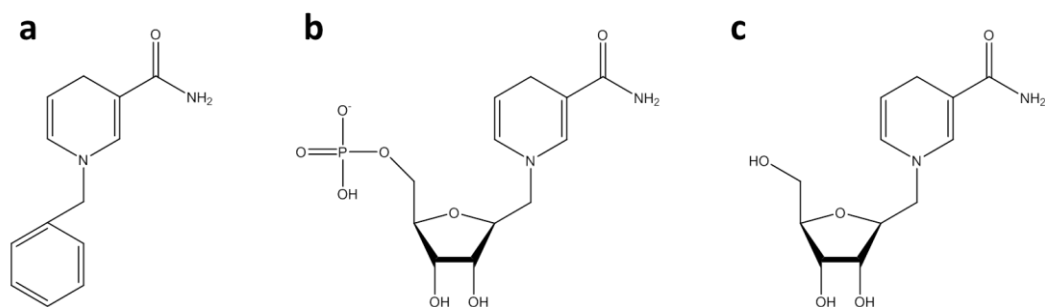

**Fig. S5.** Biomimetic cofactors (reduced form). (a) BANH, (b) NMNH, (c) NRH.

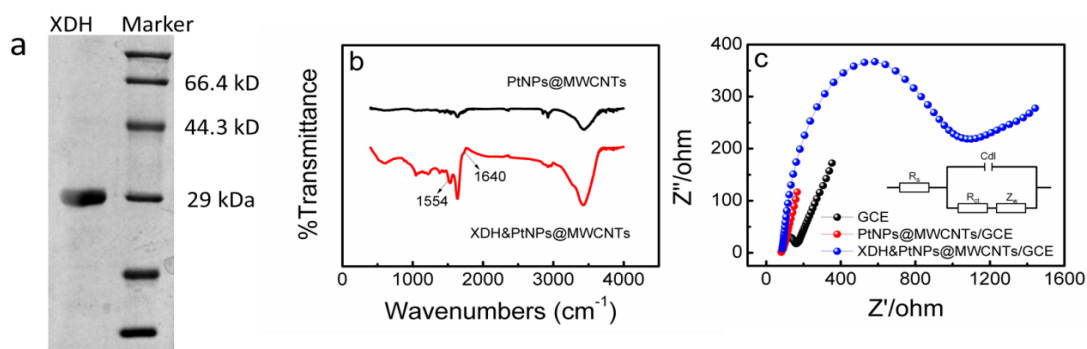

**Fig. S6.** (a) SDS-PAGE analysis of XDH, (b) FITR of PtNPs@MWCNTs and XDH&PtNPs@MWCNTs, (c) EIS of GCE, PtNPs@MWCNTs/GCE, XDH&PtNPs@MWCNTs/GCE in 5 mM  $K_3Fe(CN)_6/K_4Fe(CN)_6$ .

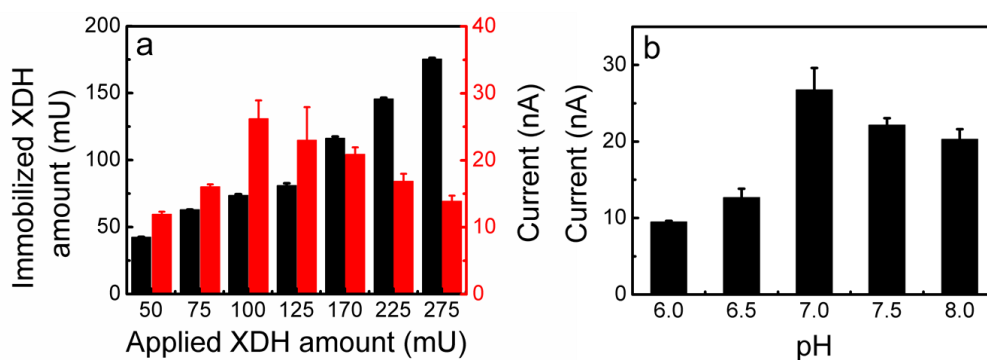

**Fig. S7.** Effects of (a) applied XDH amounts from 50 to 275 mU and (b) pHs from 6.0 to 7.0 on the performance of the xylose-sensing bioelectrode.

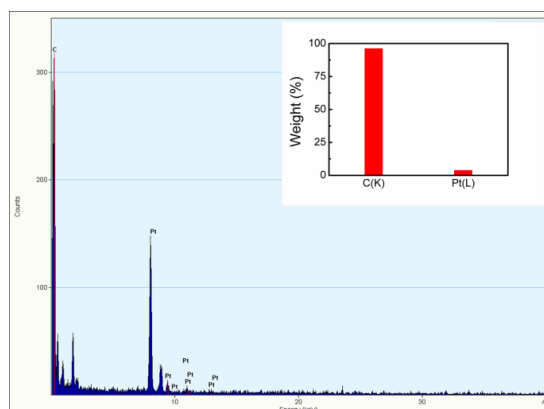

**Fig. S8.** EDS of PtNPs@MWCNTs (The insert is the weight percentage).
